# Supplementary material for: The Improvement of Nanoemulsion Stability and Antioxidation via Protein-Chlorogenic Acid-Dextran Conjugates as Emulsifiers
Source: PubMed Central journal article supplement (PMC7353371; doi:10.3390/nano10061094), 2020-06-01
Supplement: nanomaterials-10-01094-s001.pdf [file nanomaterials-10-01094-s001.pdf]

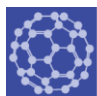

Supplementary Material

# The Improvement of Nanoemulsion Stability and Antioxidation via Protein-Chlorogenic Acid-Dextran Conjugates as Emulsifiers

Chang Liu <sup>1,†</sup>, Hua Jin <sup>1,†</sup>, Yue Yu <sup>1</sup>, Jingying Sun <sup>1</sup>, Huanyu Zheng <sup>2,3,4</sup>, Yan Zhang <sup>5</sup>, Jing Xu <sup>1,\*</sup>, and Xiuqing Zhu <sup>6,\*</sup>

<sup>1</sup> College of Art and Science, Northeast Agricultural University, Harbin 150030, Heilongjiang, China; lovekursaal@163.com (C.L.); jinhua@neau.edu.cn (H.J.); Y13206689606@163.com (Y.Y.); asunjinying@126.com (J.S.)

<sup>2</sup> College of Food Science, Northeast Agricultural University, Harbin, 150030, China; zhenghuanyu1@163.com

<sup>3</sup> Heilongjiang Green Food Science Research Institute, Harbin 150028, Heilongjiang, China

<sup>4</sup> National Research Center of Soybean Engineering and Technology, Harbin 150028, Heilongjiang, China

<sup>5</sup> Coastal Research and Extension Center, Mississippi State University, MS 39762, United States; yzhang@fsnhp.msstate.edu

<sup>6</sup> College of Food Engineering, Harbin University of Commerce; Key Laboratory of Grain Food and Comprehensive Processing of Grain Resource of Heilongjiang Province, Harbin 150076, Heilongjiang, China

\* Correspondence: xujing@neau.edu.cn (J.X.); xqzhuwang@163.com (X.Z.); Tel.: +86-1379-665-2155 (J.X.); +86-1384-510-7825 (X.Z.)

† These authors contributed equally to this work and should be considered co-first authors.

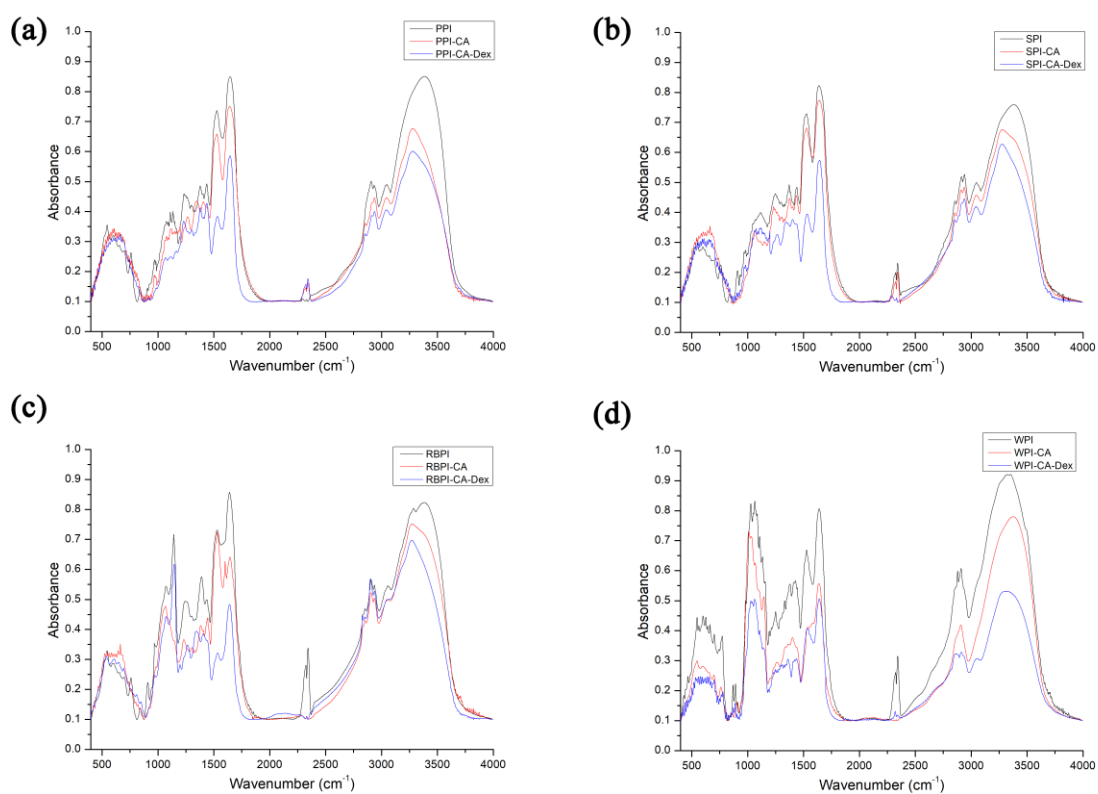

**Figure S1.** FTIR images of NP, PC and PCD. (a) represented FTIR images of PPI, PPI-CA and PPI-CA-Dex, respectively; (b) FTIR images of SPI, SPI-CA and SPI-CA-Dex, respectively; (c) FTIR images of RBPI, RBPI-CA and RBPI-CA-Dex, respectively; (d) represented FTIR images of WPI, WPI-CA and WPI-CA-Dex, respectively.

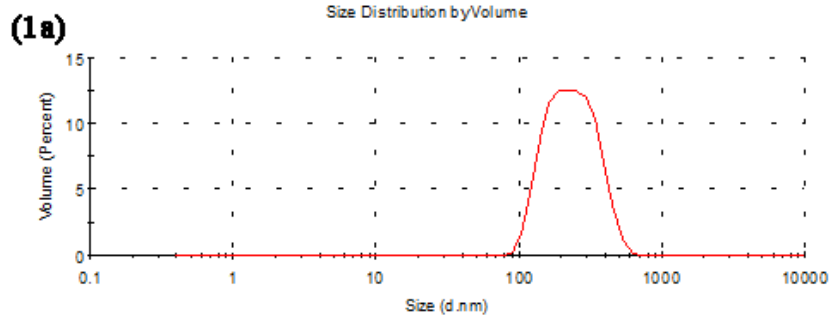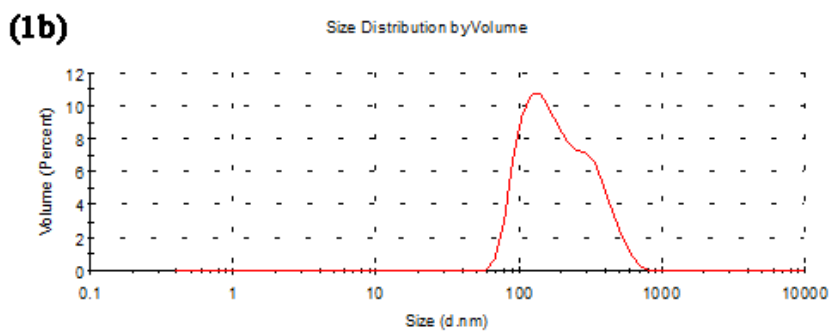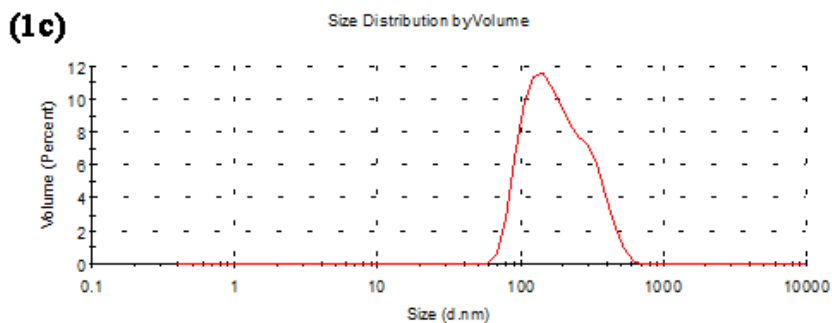

**(2a)**

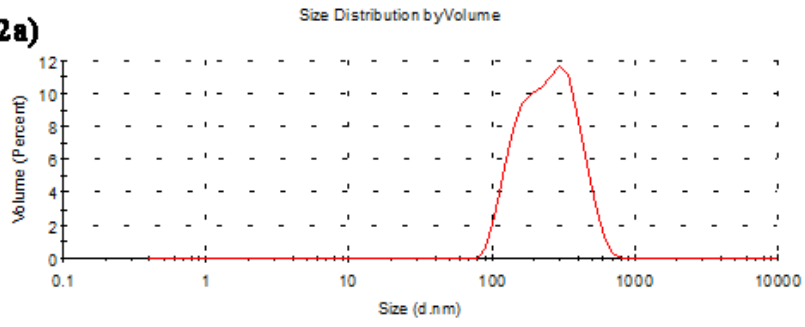

**(2b)**

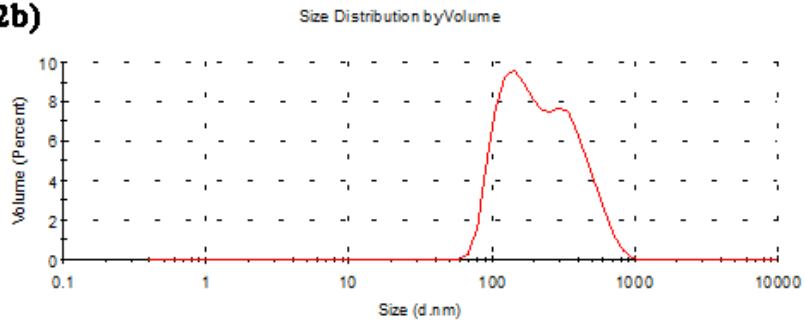

**(2c)**

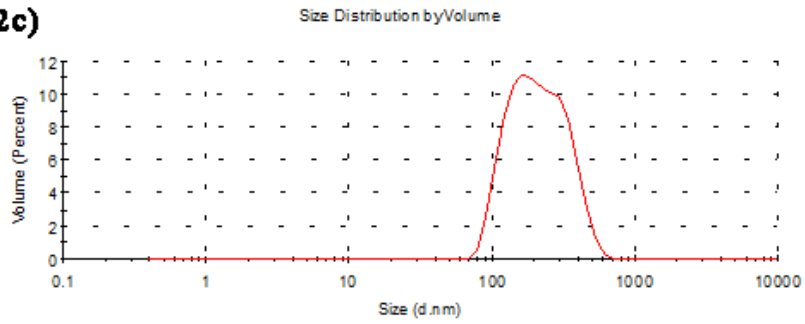

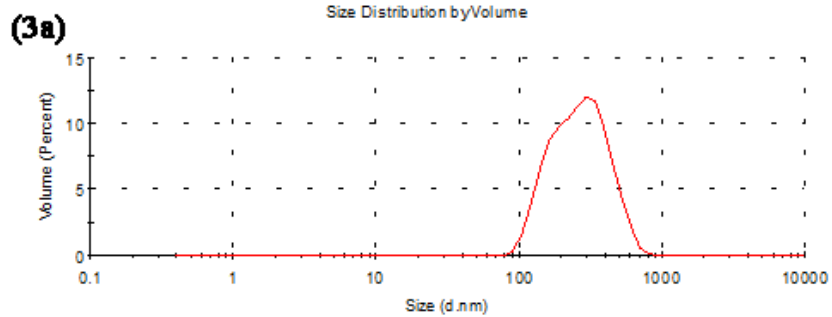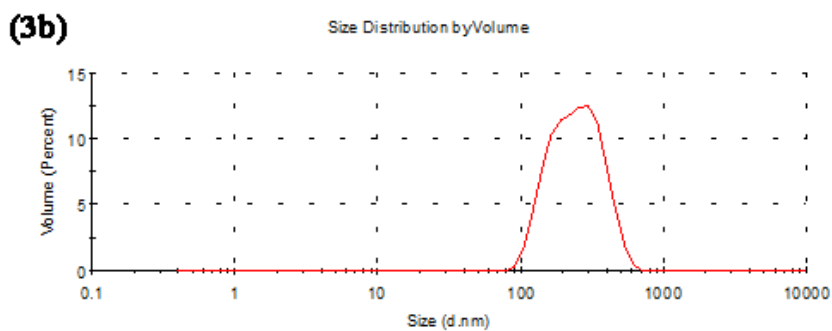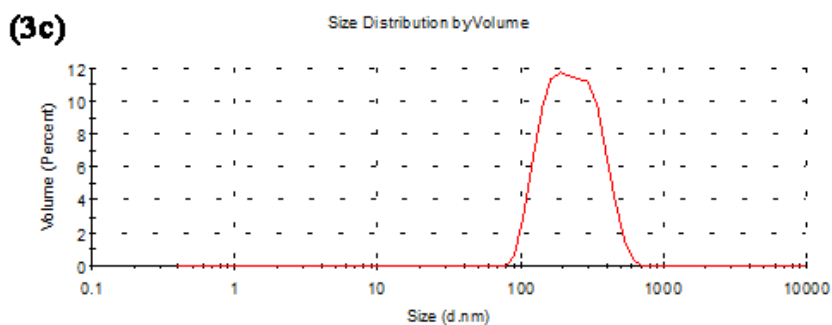

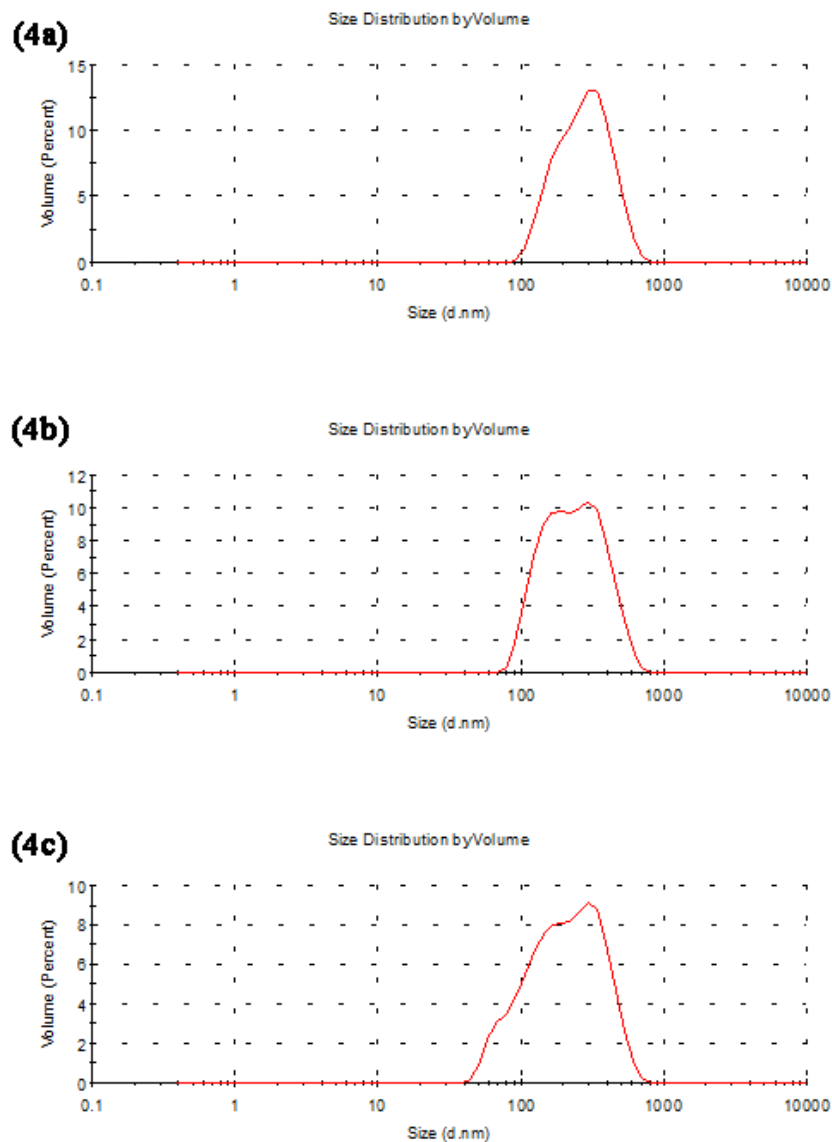

**Figure S2.** Size distribution by volume of nanoemulsions stabilized by NP, PC and PCD. **(1a–1c)** represented the size distribution of nanoemulsions stabilized by PPI, PPI-CA and PPI-CA-Dex, respectively; **(2a–2c)** represented the size distribution of nanoemulsions stabilized by SPI, SPI-CA and SPI-CA-Dex, respectively; **(3a–3c)** represented the size distribution of nanoemulsions stabilized by RBPI, RBPI-CA and RBPI-CA-Dex, respectively; **(4a–4c)** represented the size distribution of nanoemulsions stabilized by WPI, WPI-CA and WPI-CA-Dex, respectively.

**Table S1.** The polydispersity index (PDI) of nanoemulsions stabilized by NP, PC and PCD.

| <b>Nanoemulsions stabilized by</b> | <b>PDI</b> |
|------------------------------------|------------|
| PPI                                | 0.090      |
| PPI-CA                             | 0.177      |
| PPI-CA-Dex                         | 0.150      |
| SPI                                | 0.115      |
| SPI-CA                             | 0.169      |
| SPI-CA-Dex                         | 0.142      |
| RBPI                               | 0.168      |
| RBPI-CA                            | 0.099      |
| RBPI-CA-Dex                        | 0.144      |
| WPI                                | 0.160      |
| WPI-CA                             | 0.166      |
| WPI-CA-Dex                         | 0.138      |
